# Supplementary material
Source: PubMed Central journal article supplement (PMC5033753)
Supplement: jciinsight-1-87958-s001.pdf [file jciinsight-1-87958-s001.pdf]

## Supplemental figures

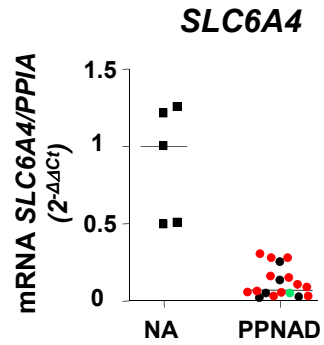

**Figure 1.** *SLC6A4* mRNAs encoding the 5-HT transporter SERT in adrenocortical explants of normal adrenals (NA) and PPNAD tissues. PPNAD with *PRKAR1A* (red), *PDE11A* (green) and no (black) mutations. mRNA expression levels were normalized to *PPIA*.

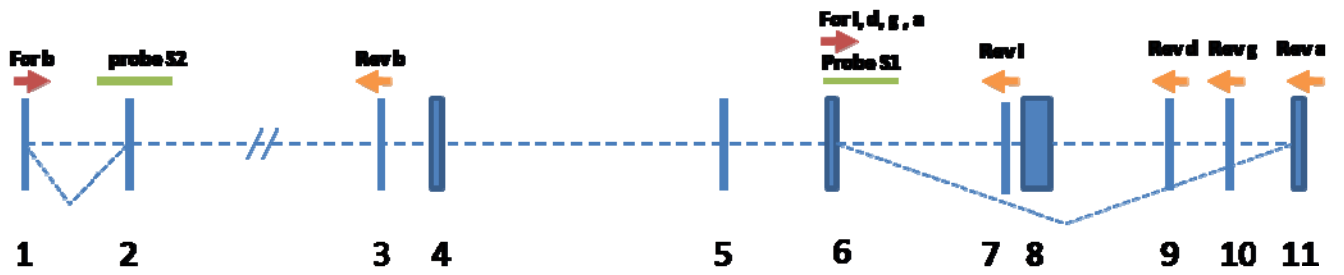

**Figure 2.** Schematic representation of the human *HTR4* gene showing the position of the primers used to amplify the *HTR4* isoform mRNAs.

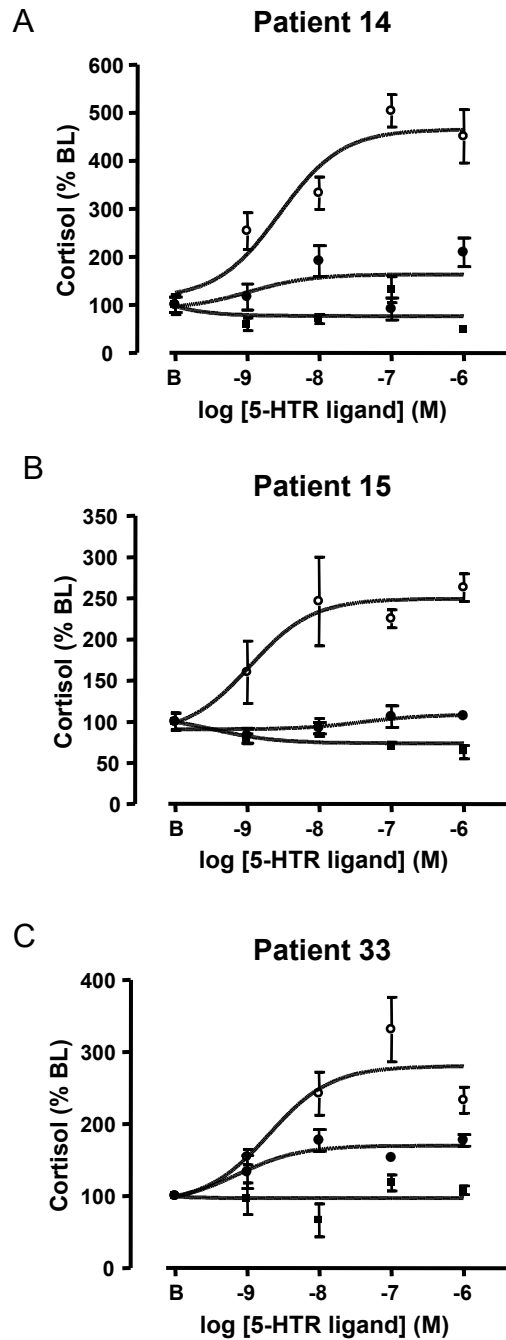

**Figure 3. Sensitivity of PPNAD cells to 5-HT<sub>4</sub> receptor agonists.** (A-C) Effects of graded concentrations (10<sup>-9</sup> to 10<sup>-6</sup> M) of 5-HT and the partial 5-HT<sub>4</sub> receptor agonists cisapride (■) and metoclopramide (●) on cortisol secretion by cultured cells derived from PPNAD patients P14 (A), P15 (B) and P33 (C). Data represents mean ± sem,

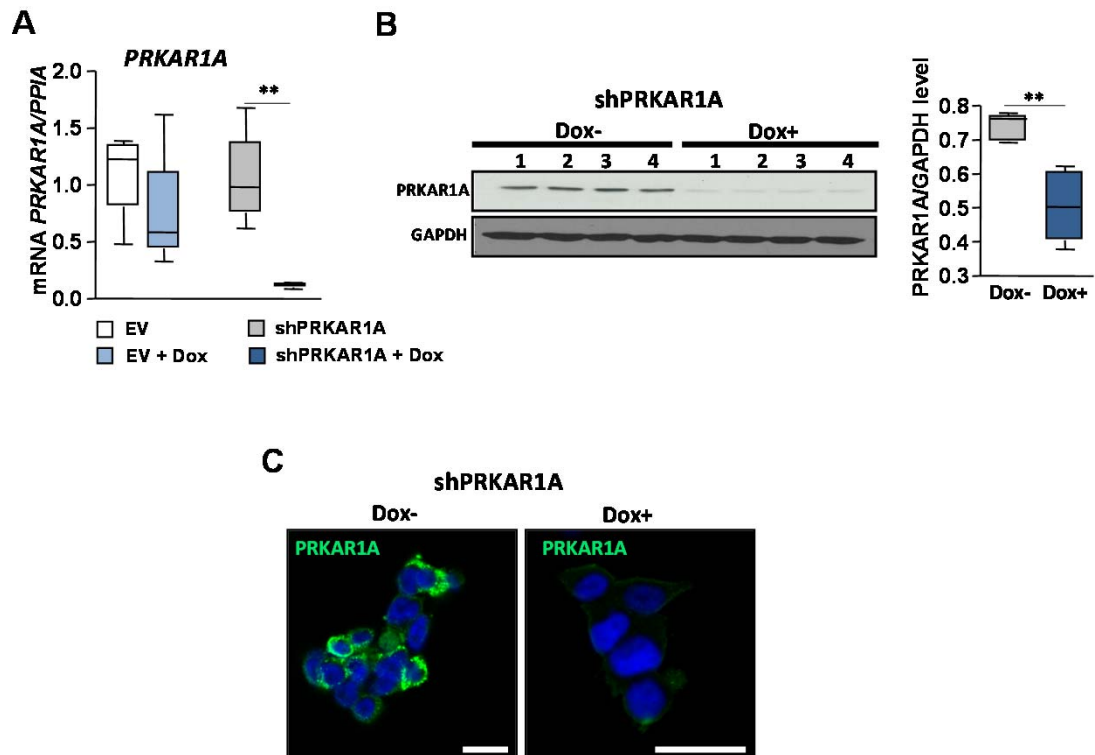

**Figure 4. *PRKAR1A* silencing in shPRKAR1A H295R cells.** (A) Expression levels of *PRKAR1A* mRNAs normalized to *PPIA* in H295R cells transfected with either the empty vector (EV) or the doxycycline sensitive shPRKAR1A expressing vector and cultured in the absence or presence of doxycycline (Dox). (B) Western blot analysis of PRKAR1A in shPRKAR1A H295R cells cultured with or without doxycycline. (C) Immunocytofluorescence staining for PRKAR1A in shPRKAR1A H295R cells cultured with or without doxycycline. Cells were treated with doxycycline to induce shPRKAR1A expression. Data of 4 determinations are presented as box plot. Data were analyzed by using Mann-Whitney t-test. \*\*,  $P < 0.01$ ; \*,  $P < 0.05$ . Scale bars: 30  $\mu\text{m}$ .

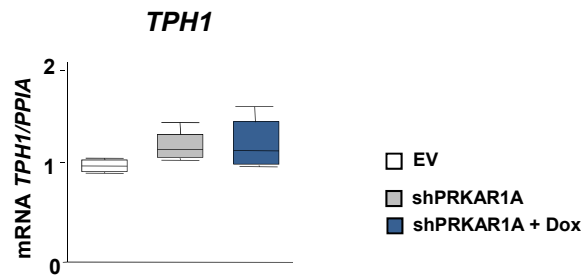

**Figure 5. Expression levels of *TPH1* mRNAs** normalized to *PPIA* in H295R cells transfected with either the empty vector (EV) or the doxycycline sensitive shPRKAR1A expressing vector and cultured in the absence or presence of doxycycline (Dox). Data are presented as box plot.

Supplemental Table 1: Clinical and genetic characteristics of the patients

| Patients | Gender | Age (Yrs) | Disease     | Gene    | Mutation                   | In vitro investigations |        |       |
|----------|--------|-----------|-------------|---------|----------------------------|-------------------------|--------|-------|
|          |        |           |             |         |                            | Cell cultures           | RT-PCR | IHC   |
| P1       | Female | 42        | PPNAD       | PRKAR1A | c.439A>G/p.Ser147Gly       | -                       | X      | -     |
| P2       | Female | 5         | PPNAD       | PRKAR1A | c.865G>T /p.G289W          | -                       | X      | -     |
| P3       | Female | 4         | iMAD        | -       | none                       | -                       | X      | -     |
| P4       | Female | 21        | PPNAD       | PRKAR1A | c.709(-5-107)del           | -                       | X      | -     |
| P5       | Female | 7         | iMAD        | PDE11A  | 171delTfs41X               | -                       | X      | -     |
| P6       | Female | 5         | iMAD/iPPNAD | -       | none                       | -                       | X      | -     |
| P7       | Male   | 53        | PPNAD       | PRKAR1A | c.891+3A>G/                | -                       | X      | X     |
| P8       | Female | 14        | PPNAD       | PRKAR1A | c.101_105del/p.S34fsX9     | -                       | X      | X     |
| P9       | Female | 7         | iMAD        | -       | none                       | -                       | X      | -     |
| P10      | Female | 27        | PPNAD       | PRKAR1A | c.177+1G>A                 | -                       | X      | -     |
| P11      | Female | 16        | PPNAD       | PRKAR1A | c.43_58del/p.L15SfsX104    | -                       | X      | X     |
| P12      | Female | 22        | PPNAD       | PRKAR1A | c.491_492del/ p.V164DfsX4  | -                       | X      | -     |
| P13      | Female | 27        | PPNAD       | PRKAR1A | C 709 (-7-2)del 6          | -                       | -      | X     |
| P14      | Female | 56        | PPNAD       | PRKAR1A | C 709 (-7-2)del 6          | X                       | -      | X     |
| P15      | Female | 35        | PPNAD       | PRKAR1A | C 709 (-7-2)del 6          | X                       | -      | X     |
| P16      | Female | 43        | PPNAD       | -       | none                       | -                       | X      | X     |
| P17      | Female | 16        | PPNAD       | PRKAR1A | c.440+1insG                | -                       | X      | X     |
| P18      | Male   | 19        | PPNAD       | -       | none                       | -                       | -      | X     |
| P19      | Female | 33        | PPNAD       | PRKAR1A | c.178-22A>G                | -                       | -      | X     |
| P20      | Female | 45        | PPNAD       | PRKAR1A | c.353_365del/p.I118TfsX6   | -                       | X      | X     |
| P21      | Female | 14        | PPNAD       | PRKAR1A | c.-7+5delG                 | X                       | X      | X     |
| P22      | Female | 49        | PPNAD       | PRKAR1A | C 709 (-7-2)del 6          | -                       | -      | X     |
| P23      | Female | 25        | PPNAD       | PRKAR1A | C 709 (-7-2)del 6          | -                       | -      | X     |
| P24      | Female | 56        | PPNAD       | PRKAR1A | none                       | -                       | -      | X     |
| P25      | Female | 38        | PPNAD       | PDE11A  | 1655_1657delTCT/insCCfs15X | -                       | -      | X     |
| P26      | Female | 16        | PPNAD       | -       | -                          | -                       | -      | X     |
| P27      | Female | 14        | PPNAD       | PRKAR1A | none                       | -                       | -      | X     |
| P28      | Female | 49        | PPNAD       | PRKAR1A | C 709 (-7-2)del 6          | X                       | -      | X     |
| P29      | Female | 12        | PPNAD       | PRKAR1A | C 709 (-7-2)del 6          | X                       | -      | X     |
| P30      | Female | 16        | PPNAD       | -       | none                       | -                       | -      | X     |
| P31      | Female | 47        | PPNAD       | PRKAR1A | c.763-764 del AT           | -                       | X      | X     |
| P32      | Female | 27        | PPNAD       | PRKAR1A | none                       | X                       | X      | -     |
| P33      | Male   | 28        | PPNAD       | PRKAR1A | none                       | X                       | -      | -     |
| Total    |        |           |             |         |                            | 7/33                    | 18/33  | 22/33 |

IHC, immunohistochemistry

Supplemental Table 2: Biological and radiological characteristics of PPNAD patients enrolled for adrenocortical cell culture experiments

| Patients                                                           | P14    | P15    | P21    | P28    | P29        | P32    | P33    |
|--------------------------------------------------------------------|--------|--------|--------|--------|------------|--------|--------|
| Urinary Free Cortisol (UCF) (µg/24h) (N<80)                        | 76     | 200    | 328    | 110    | 303        | 161    | 447    |
| Plasma Cortisol at 08H00 (µg/l) (N: 90-308)                        | 155    | 194    | -      | 217    | 3.9 saliva | 180    | 168    |
| Plasma Cortisol at 00h00 (µg/l) (N< 75)                            | 138    | 180    | 230    | 226    | 5.7 saliva | 204    | 160    |
| ACTH Plasma at 08H00 (pg/ml)                                       | <5     | <5     | <5     | <5     | <5         | 3      | <5     |
| Paradoxical plasma cortisol response to dexamethasone <sup>1</sup> | Yes    | No     | Yes    | Yes    | Yes        | Yes    | Yes    |
| Presentation of adrenal glands at CT Scan                          | MicroN | MicroN | MicroN | MicroN | MicroN     | MicroN | MicroN |

CT, computerized tomography; MicroN, micronodular

1. Stratakis, C. A. *et al.* Paradoxical response to dexamethasone in the diagnosis of primary pigmented nodular adrenocortical disease. *Ann. Intern. Med.* **131**, 585–591 (1999).

Supplemental Table 3: Expression of *HTR4* splicing variants in PPNAD

| Patients   | P1 | P2 | P3 | P4 | P5 | P6 | P7 | P8 | P9 | P10 |
|------------|----|----|----|----|----|----|----|----|----|-----|
| <b>(a)</b> | +  | +  | +  | +  | +  | +  | +  | +  | +  | +   |
| <b>(b)</b> | +  | +  | +  | +  | +  | +  | +  | +  | +  | +   |
| <b>(d)</b> | -  | -  | -  | -  | -  | -  | -  | -  | -  | -   |
| <b>(g)</b> | +  | -  | -  | -  | +  | -  | -  | -  | -  | +   |
| <b>(i)</b> | +  | -  | +  | +  | -  | -  | -  | +  | -  | -   |

+, isoform detected; -, isoform not detected



Supplemental Table 4: Sequences and GenBank accession numbers of the primers used for Real-Time PCR studies

| Gene name      | Accession number                                                                                   | Primer  | Sequence primer                   | Product size (bp) |
|----------------|----------------------------------------------------------------------------------------------------|---------|-----------------------------------|-------------------|
| <b>TPH1</b>    | NM_004179.2                                                                                        | Forward | 5'-TGCAAAGGAGAAGATGAGAGAATTTAC-3' | 114               |
|                |                                                                                                    | Reverse | 5'-CTGTTATGCTCTTGGTGTCTTTC-3'     |                   |
| <b>TPH2</b>    | NM_173353.3                                                                                        | Forward | 5'-GCCTTCTCTGTGTTATTAG-3'         | 186               |
|                |                                                                                                    | Reverse | 5'-TCATCCAACTGCTGTGTTACC-3'       |                   |
| <b>SLC6A4</b>  | NM_001045.5                                                                                        | Forward | 5'-TGGTTCTATGGCATCACTCAGTTC-3'    | 148               |
|                |                                                                                                    | Reverse | 5'-GTTGTGGCGGGCTCATCAG-3'         |                   |
| <b>HTR4</b>    | NM_001040169.2<br>NM_000870.6<br>NM_001286410.1<br>NM_001040172.2<br>NM_199453.3<br>NM_001040173.2 | Forward | 5'-CTGGTGGCCTTCTACATCCC-3'        | 199               |
|                |                                                                                                    | Reverse | 5'-ATGCACAGGGTCTTGCTGC-3'         |                   |
| <b>HTR6</b>    | NM_000871.2                                                                                        | Forward | 5'-GGGTGCCATATGCTTACCT -3'        | 150               |
|                |                                                                                                    | Reverse | 5'-TCAGCAGACTCCACCCTG -3'         |                   |
| <b>HTR7</b>    | NM_000872.4<br>NM_019860.3<br>NM_019859.3                                                          | Forward | 5'-AAAACATCTCCATCTTTAAGCGAGAA-3'  | 70                |
|                |                                                                                                    | Reverse | 5'-GTAAGGCCCGACGATGAT-3'          |                   |
| <b>PRKAR1A</b> | NM_002734.4<br>NM_212471.2<br>NM_212472.2<br>NM_001276289.1<br>NM_001276290.1<br>NM_001278433.1    | Forward | 5'-AATGGCCGCTTTAGCCAAAGCC-3'      | 235               |
|                |                                                                                                    | Reverse | 5'-TTCTCAAAGCTCCCTCCTTC-3'        |                   |
| <b>ACTB</b>    | NM_001101.3                                                                                        | Forward | 5'-ACCTGTACGCCAACACAGTG-3'        | 144               |
|                |                                                                                                    | Reverse | 5'-ACACGGAGTACTTGCGCTCA-3'        |                   |
| <b>PPIA</b>    | NM_001300981.1<br>NM_021130.4                                                                      | Forward | 5'-ATGCACTGGTGGCAAGTCC-3'         | 241               |
|                |                                                                                                    | Reverse | 5'-TTGCCATTCTGGACCCAAA-3'         |                   |
| <b>CYP11B1</b> | NM_000497.3                                                                                        | Forward | 5'-AGGAGACCTTGCGGCTTACC-3'        | 110               |
|                |                                                                                                    | Reverse | 5'-GAACACGCGACCAATGTC-3'          |                   |

Supplemental Table 5: Sequences and GenBank accession numbers of the primers used for PCR amplification of *HTR4* splicing variants.

| HTR4 isoforms                          | Accession number | Primer  | Sequence primer                       | Product size |
|----------------------------------------|------------------|---------|---------------------------------------|--------------|
| (a)                                    | NM_001040169.2   | Forward | 5'-CGGGCAGGAGCCTCCTCCGAGAG-3'         | 439          |
|                                        |                  | Reverse | 5'-GTATGGGCAGTTTCTCGAGTTCCTGATGATG-3' |              |
| (b)                                    | NM_000870.6      | Forward | 5'-GAATCTGCCAGGGCACCTCGCT-3'          | 207          |
|                                        |                  | Reverse | 5'-ACCAGCAGGTTCCCAAGAT-3'             |              |
| (g)                                    | NM_199453.3      | Forward | 5'-CGGGCAGGAGCCTCCTCCGAGAG-3'         | 398          |
|                                        |                  | Reverse | 5'-CAGAAGAGCAGGAGGAAGCTGGAGACAG-3'    |              |
| (d)                                    | NM_001040172.2   | Forward | 5'-CGGGCAGGAGCCTCCTCCGAGAG-3'         | 494          |
|                                        |                  | Reverse | 5'-CATCCAATGAATTTATTTGATAACTTCAG-3'   |              |
| (i)                                    | NM_001040173.2   | Forward | 5'-CGGGCAGGAGCCTCCTCCGAGAG-3'         | 455          |
|                                        |                  | Reverse | 5'-AATGGACCCGCTCTGGCAGGCTTT-3'        |              |
| Probes used for southern blot analysis |                  | S1      | 5'-CCCTGGGCAGGTGTGGACTGC-3'           | -            |
|                                        |                  | S2      | 5'- TGGACAAACTTGATGCTAA-3'            | -            |

Supplemental Table 6: Antibodies used for immunohistochemical and/or immunohistofluorescence studies

| Antibodies                           | Source                                                            | Host              | Antigen retrieval                    | Dilution |
|--------------------------------------|-------------------------------------------------------------------|-------------------|--------------------------------------|----------|
| 5-HT                                 | AB serotec (AHP 522)                                              | Polyclonal rabbit | Citrate buffer pH=6<br>95°C – 20 min | 1:20     |
| 5-HT <sub>4</sub> R                  | MBL (LS-A655)                                                     | Ployclonal rabbit | Citrate buffer pH=6<br>95°C – 20 min | 1:100    |
| 5-HT <sub>6</sub> R                  | Abcam (ab101911)                                                  | Polyclonal rabbit | -                                    | 1:1200   |
| 5-HT <sub>7</sub> R                  | Sigma (S0320)                                                     | Polyclonal rabbit | Citrate buffer pH=6<br>95°C – 20 min | 1:500    |
| Tryptophan hydroxylase               | Sigma (T0678)                                                     | Monoclonal mouse  | -                                    | 1:500    |
| Tryptophan hydroxylase type 2 (Tph2) | Everest BIOTECH (EB07050)                                         | Polyclonal goat   | -                                    | 1:500    |
| Steroidogenic factor 1 (SF1)         | R&D systems (PP-N1665-00)                                         | Monoclonal mouse  | Citrate buffer pH=6<br>95°C – 20 min | 1:100    |
| Tryptase                             | AB serotec (MCA 1438T)                                            | Monoclonal mouse  | -                                    | 1:20     |
| 17 $\alpha$ -Hydroxylase (17-OH)     | Drs. V. Luu the and G. Pelletier, Laval University Medical Center | Polyclonal rabbit | Citrate buffer pH=6<br>95°C – 20 min | 1:2000   |

Supplemental Table 7: Antibodies used for western blot analyses

| <b>Antibodies</b>        | <b>Source</b>          | <b>Host</b>       | <b>Predicted molecular weight</b> | <b>Dilution</b> |
|--------------------------|------------------------|-------------------|-----------------------------------|-----------------|
| <b>Tph2</b>              | Abcam (ab111828)       | Polyclonal rabbit | 56 kDa                            | 1:1000          |
| <b>5-HT<sub>4</sub>R</b> | Abcam (ab87337)        | Polyclonal rabbit | 43 kDa                            | 1:400           |
| <b>5-HT<sub>6</sub>R</b> | Abcam (ab101911)       | Polyclonal rabbit | 47 kDa                            | 1:1000          |
| <b>5-HT<sub>7</sub>R</b> | Abcam (ab128892)       | Monoclonal rabbit | 54 kDa                            | 1:1000          |
| <b>GAPDH</b>             | Cell signaling (14C10) | Polyclonal rabbit | 37 kDa                            | 1:1000          |
